# Supplementary material for: Cost-effectiveness of empagliflozin as a treatment for heart failure with reduced ejection fraction: an analysis from the Chinese healthcare perspective
Source: PubMed Central journal article supplement — J Thorac Dis. 2022 May;14(5):1588–97. doi: 10.21037/jtd-22-463 (PMC9186229; doi:10.21037/jtd-22-463), 2022-05
Supplement: jtd-14-05-1588-coif.pdf [file jtd-14-05-1588-coif.pdf]

## ICMJE DISCLOSURE FORM

Date: 2022-04-08

Your Name: Xiaohui Lin

Manuscript Title: Cost-effectiveness of empagliflozin as a treatment for heart failure with reduced ejection fraction: an analysis from the Chinese healthcare perspective

Manuscript number (if known): \_\_\_\_\_

In the interest of transparency, we ask you to disclose all relationships/activities/interests listed below that are related to the content of your manuscript. "Related" means any relation with for-profit or not-for-profit third parties whose interests may be affected by the content of the manuscript. Disclosure represents a commitment to transparency and does not necessarily indicate a bias. If you are in doubt about whether to list a relationship/activity/interest, it is preferable that you do so.

The following questions apply to the author's relationships/activities/interests as they relate to the current manuscript only.

The author's relationships/activities/interests should be defined broadly. For example, if your manuscript pertains to the epidemiology of hypertension, you should declare all relationships with manufacturers of antihypertensive medication, even if that medication is not mentioned in the manuscript.

In item #1 below, report all support for the work reported in this manuscript without time limit. For all other items, the time frame for disclosure is the past 36 months.

|                                                           |                                                                                                                                                                                | Name all entities with whom you have this relationship or indicate none (add rows as needed) | Specifications/Comments (e.g., if payments were made to you or to your institution) |
|-----------------------------------------------------------|--------------------------------------------------------------------------------------------------------------------------------------------------------------------------------|----------------------------------------------------------------------------------------------|-------------------------------------------------------------------------------------|
| <b>Time frame: Since the initial planning of the work</b> |                                                                                                                                                                                |                                                                                              |                                                                                     |
| 1                                                         | All support for the present manuscript (e.g., funding, provision of study materials, medical writing, article processing charges, etc.)<br><b>No time limit for this item.</b> | The project was supported                                                                    |                                                                                     |
|                                                           |                                                                                                                                                                                | by the Natural Science                                                                       |                                                                                     |
|                                                           |                                                                                                                                                                                | Foundation of Fujian                                                                         |                                                                                     |
|                                                           |                                                                                                                                                                                | Province, China (grant No.                                                                   |                                                                                     |
|                                                           |                                                                                                                                                                                | 2020J011341) and the                                                                         |                                                                                     |
|                                                           |                                                                                                                                                                                | Health Youth Scientific                                                                      |                                                                                     |
|                                                           | Research Project of Fujian                                                                                                                                                     |                                                                                              |                                                                                     |
|                                                           | Province, China (grant No.                                                                                                                                                     |                                                                                              |                                                                                     |
|                                                           | 2021QNA075).                                                                                                                                                                   |                                                                                              |                                                                                     |
| <b>Time frame: past 36 months</b>                         |                                                                                                                                                                                |                                                                                              |                                                                                     |
| 2                                                         | Grants or contracts from any entity (if not indicated in item #1 above).                                                                                                       | <input checked="" type="checkbox"/> None                                                     |                                                                                     |
|                                                           |                                                                                                                                                                                |                                                                                              |                                                                                     |
| 3                                                         | Royalties or licenses                                                                                                                                                          | <input checked="" type="checkbox"/> None                                                     |                                                                                     |
|                                                           |                                                                                                                                                                                |                                                                                              |                                                                                     |

|    |                                                                                                              |               |  |
|----|--------------------------------------------------------------------------------------------------------------|---------------|--|
| 4  | Consulting fees                                                                                              | <u>√</u> None |  |
| 5  | Payment or honoraria for lectures, presentations, speakers bureaus, manuscript writing or educational events | <u>√</u> None |  |
| 6  | Payment for expert testimony                                                                                 | <u>√</u> None |  |
| 7  | Support for attending meetings and/or travel                                                                 | <u>√</u> None |  |
| 8  | Patents planned, issued or pending                                                                           | <u>√</u> None |  |
| 9  | Participation on a Data Safety Monitoring Board or Advisory Board                                            | <u>√</u> None |  |
| 10 | Leadership or fiduciary role in other board, society, committee or advocacy group, paid or unpaid            | <u>√</u> None |  |
| 11 | Stock or stock options                                                                                       | <u>√</u> None |  |
| 12 | Receipt of equipment, materials, drugs, medical writing, gifts or other services                             | <u>√</u> None |  |
| 13 | Other financial or non-financial interests                                                                   | <u>√</u> None |  |

**Please summarize the above conflict of interest in the following box:**

The project was supported by the Natural Science Foundation of Fujian Province, China (grant No. 2020J011341) and the Health Youth Scientific Research Project of Fujian Province, China (grant No. 2021QNA075). The authors have no other conflicts of interest to declare.

**Please place an "X" next to the following statement to indicate your agreement:**

X I certify that I have answered every question and have not altered the wording of any of the questions on this form.

## ICMJE DISCLOSURE FORM

Date: 2022-04-08

Your Name: Minhua Lin

Manuscript Title: Cost-effectiveness of empagliflozin as a treatment for heart failure with reduced ejection fraction: an analysis from the Chinese healthcare perspective

Manuscript number (if known): \_\_\_\_\_

In the interest of transparency, we ask you to disclose all relationships/activities/interests listed below that are related to the content of your manuscript. "Related" means any relation with for-profit or not-for-profit third parties whose interests may be affected by the content of the manuscript. Disclosure represents a commitment to transparency and does not necessarily indicate a bias. If you are in doubt about whether to list a relationship/activity/interest, it is preferable that you do so.

The following questions apply to the author's relationships/activities/interests as they relate to the current manuscript only.

The author's relationships/activities/interests should be defined broadly. For example, if your manuscript pertains to the epidemiology of hypertension, you should declare all relationships with manufacturers of antihypertensive medication, even if that medication is not mentioned in the manuscript.

In item #1 below, report all support for the work reported in this manuscript without time limit. For all other items, the time frame for disclosure is the past 36 months.

|                                                           |                                                                                                                                                                                | Name all entities with whom you have this relationship or indicate none (add rows as needed) | Specifications/Comments (e.g., if payments were made to you or to your institution) |
|-----------------------------------------------------------|--------------------------------------------------------------------------------------------------------------------------------------------------------------------------------|----------------------------------------------------------------------------------------------|-------------------------------------------------------------------------------------|
| <b>Time frame: Since the initial planning of the work</b> |                                                                                                                                                                                |                                                                                              |                                                                                     |
| 1                                                         | All support for the present manuscript (e.g., funding, provision of study materials, medical writing, article processing charges, etc.)<br><b>No time limit for this item.</b> | The project was supported                                                                    |                                                                                     |
|                                                           |                                                                                                                                                                                | by the Natural Science                                                                       |                                                                                     |
|                                                           |                                                                                                                                                                                | Foundation of Fujian                                                                         |                                                                                     |
|                                                           |                                                                                                                                                                                | Province, China (grant No.                                                                   |                                                                                     |
|                                                           |                                                                                                                                                                                | 2020J011341) and the                                                                         |                                                                                     |
|                                                           |                                                                                                                                                                                | Health Youth Scientific                                                                      |                                                                                     |
|                                                           |                                                                                                                                                                                | Research Project of Fujian                                                                   |                                                                                     |
|                                                           |                                                                                                                                                                                | Province, China (grant No.                                                                   |                                                                                     |
|                                                           |                                                                                                                                                                                | 2021QNA075).                                                                                 |                                                                                     |
| <b>Time frame: past 36 months</b>                         |                                                                                                                                                                                |                                                                                              |                                                                                     |
| 2                                                         | Grants or contracts from any entity (if not indicated in item #1 above).                                                                                                       | <input checked="" type="checkbox"/> None                                                     |                                                                                     |
|                                                           |                                                                                                                                                                                |                                                                                              |                                                                                     |
| 3                                                         | Royalties or licenses                                                                                                                                                          | <input checked="" type="checkbox"/> None                                                     |                                                                                     |
|                                                           |                                                                                                                                                                                |                                                                                              |                                                                                     |

|    |                                                                                                              |               |  |
|----|--------------------------------------------------------------------------------------------------------------|---------------|--|
| 4  | Consulting fees                                                                                              | <u>√</u> None |  |
| 5  | Payment or honoraria for lectures, presentations, speakers bureaus, manuscript writing or educational events | <u>√</u> None |  |
| 6  | Payment for expert testimony                                                                                 | <u>√</u> None |  |
| 7  | Support for attending meetings and/or travel                                                                 | <u>√</u> None |  |
| 8  | Patents planned, issued or pending                                                                           | <u>√</u> None |  |
| 9  | Participation on a Data Safety Monitoring Board or Advisory Board                                            | <u>√</u> None |  |
| 10 | Leadership or fiduciary role in other board, society, committee or advocacy group, paid or unpaid            | <u>√</u> None |  |
| 11 | Stock or stock options                                                                                       | <u>√</u> None |  |
| 12 | Receipt of equipment, materials, drugs, medical writing, gifts or other services                             | <u>√</u> None |  |
| 13 | Other financial or non-financial interests                                                                   | <u>√</u> None |  |

**Please summarize the above conflict of interest in the following box:**

The project was supported by the Natural Science Foundation of Fujian Province, China (grant No. 2020J011341) and the Health Youth Scientific Research Project of Fujian Province, China (grant No. 2021QNA075). The authors have no other conflicts of interest to declare.

**Please place an "X" next to the following statement to indicate your agreement:**

X I certify that I have answered every question and have not altered the wording of any of the questions on this form.

## ICMJE DISCLOSURE FORM

Date: 2022-04-08

Your Name: Maobai Liu

Manuscript Title: Cost-effectiveness of empagliflozin as a treatment for heart failure with reduced ejection fraction: an analysis from the Chinese healthcare perspective

Manuscript number (if known): \_\_\_\_\_

In the interest of transparency, we ask you to disclose all relationships/activities/interests listed below that are related to the content of your manuscript. "Related" means any relation with for-profit or not-for-profit third parties whose interests may be affected by the content of the manuscript. Disclosure represents a commitment to transparency and does not necessarily indicate a bias. If you are in doubt about whether to list a relationship/activity/interest, it is preferable that you do so.

The following questions apply to the author's relationships/activities/interests as they relate to the current manuscript only.

The author's relationships/activities/interests should be defined broadly. For example, if your manuscript pertains to the epidemiology of hypertension, you should declare all relationships with manufacturers of antihypertensive medication, even if that medication is not mentioned in the manuscript.

In item #1 below, report all support for the work reported in this manuscript without time limit. For all other items, the time frame for disclosure is the past 36 months.

|                                                           |                                                                                                                                                                                | Name all entities with whom you have this relationship or indicate none (add rows as needed) | Specifications/Comments (e.g., if payments were made to you or to your institution) |
|-----------------------------------------------------------|--------------------------------------------------------------------------------------------------------------------------------------------------------------------------------|----------------------------------------------------------------------------------------------|-------------------------------------------------------------------------------------|
| <b>Time frame: Since the initial planning of the work</b> |                                                                                                                                                                                |                                                                                              |                                                                                     |
| 1                                                         | All support for the present manuscript (e.g., funding, provision of study materials, medical writing, article processing charges, etc.)<br><b>No time limit for this item.</b> | The project was supported                                                                    |                                                                                     |
|                                                           |                                                                                                                                                                                | by the Natural Science                                                                       |                                                                                     |
|                                                           |                                                                                                                                                                                | Foundation of Fujian                                                                         |                                                                                     |
|                                                           |                                                                                                                                                                                | Province, China (grant No.                                                                   |                                                                                     |
|                                                           |                                                                                                                                                                                | 2020J011341) and the                                                                         |                                                                                     |
|                                                           |                                                                                                                                                                                | Health Youth Scientific                                                                      |                                                                                     |
|                                                           |                                                                                                                                                                                | Research Project of Fujian                                                                   |                                                                                     |
|                                                           |                                                                                                                                                                                | Province, China (grant No.                                                                   |                                                                                     |
|                                                           |                                                                                                                                                                                | 2021QNA075).                                                                                 |                                                                                     |
| <b>Time frame: past 36 months</b>                         |                                                                                                                                                                                |                                                                                              |                                                                                     |
| 2                                                         | Grants or contracts from any entity (if not indicated in item #1 above).                                                                                                       | <input checked="" type="checkbox"/> None                                                     |                                                                                     |
|                                                           |                                                                                                                                                                                |                                                                                              |                                                                                     |
| 3                                                         | Royalties or licenses                                                                                                                                                          | <input checked="" type="checkbox"/> None                                                     |                                                                                     |
|                                                           |                                                                                                                                                                                |                                                                                              |                                                                                     |

|    |                                                                                                              |               |  |
|----|--------------------------------------------------------------------------------------------------------------|---------------|--|
| 4  | Consulting fees                                                                                              | <u>√</u> None |  |
| 5  | Payment or honoraria for lectures, presentations, speakers bureaus, manuscript writing or educational events | <u>√</u> None |  |
| 6  | Payment for expert testimony                                                                                 | <u>√</u> None |  |
| 7  | Support for attending meetings and/or travel                                                                 | <u>√</u> None |  |
| 8  | Patents planned, issued or pending                                                                           | <u>√</u> None |  |
| 9  | Participation on a Data Safety Monitoring Board or Advisory Board                                            | <u>√</u> None |  |
| 10 | Leadership or fiduciary role in other board, society, committee or advocacy group, paid or unpaid            | <u>√</u> None |  |
| 11 | Stock or stock options                                                                                       | <u>√</u> None |  |
| 12 | Receipt of equipment, materials, drugs, medical writing, gifts or other services                             | <u>√</u> None |  |
| 13 | Other financial or non-financial interests                                                                   | <u>√</u> None |  |

**Please summarize the above conflict of interest in the following box:**

The project was supported by the Natural Science Foundation of Fujian Province, China (grant No. 2020J011341) and the Health Youth Scientific Research Project of Fujian Province, China (grant No. 2021QNA075). The authors have no other conflicts of interest to declare.

**Please place an "X" next to the following statement to indicate your agreement:**

X I certify that I have answered every question and have not altered the wording of any of the questions on this form.

## ICMJE DISCLOSURE FORM

Date: 2022-04-08

Your Name: Weiying Huang

Manuscript Title: Cost-effectiveness of empagliflozin as a treatment for heart failure with reduced ejection fraction: an analysis from the Chinese healthcare perspective

Manuscript number (if known): \_\_\_\_\_

In the interest of transparency, we ask you to disclose all relationships/activities/interests listed below that are related to the content of your manuscript. "Related" means any relation with for-profit or not-for-profit third parties whose interests may be affected by the content of the manuscript. Disclosure represents a commitment to transparency and does not necessarily indicate a bias. If you are in doubt about whether to list a relationship/activity/interest, it is preferable that you do so.

The following questions apply to the author's relationships/activities/interests as they relate to the **current manuscript only**.

The author's relationships/activities/interests should be **defined broadly**. For example, if your manuscript pertains to the epidemiology of hypertension, you should declare all relationships with manufacturers of antihypertensive medication, even if that medication is not mentioned in the manuscript.

In item #1 below, report all support for the work reported in this manuscript without time limit. For all other items, the time frame for disclosure is the past 36 months.

|                                                           |                                                                                                                                                                                | Name all entities with whom you have this relationship or indicate none (add rows as needed) | Specifications/Comments (e.g., if payments were made to you or to your institution) |
|-----------------------------------------------------------|--------------------------------------------------------------------------------------------------------------------------------------------------------------------------------|----------------------------------------------------------------------------------------------|-------------------------------------------------------------------------------------|
| <b>Time frame: Since the initial planning of the work</b> |                                                                                                                                                                                |                                                                                              |                                                                                     |
| 1                                                         | All support for the present manuscript (e.g., funding, provision of study materials, medical writing, article processing charges, etc.)<br><b>No time limit for this item.</b> | The project was supported                                                                    |                                                                                     |
|                                                           |                                                                                                                                                                                | by the Natural Science                                                                       |                                                                                     |
|                                                           |                                                                                                                                                                                | Foundation of Fujian                                                                         |                                                                                     |
|                                                           |                                                                                                                                                                                | Province, China (grant No.                                                                   |                                                                                     |
|                                                           |                                                                                                                                                                                | 2020J011341) and the                                                                         |                                                                                     |
|                                                           |                                                                                                                                                                                | Health Youth Scientific                                                                      |                                                                                     |
|                                                           |                                                                                                                                                                                | Research Project of Fujian                                                                   |                                                                                     |
|                                                           |                                                                                                                                                                                | Province, China (grant No.                                                                   |                                                                                     |
|                                                           |                                                                                                                                                                                | 2021QNA075).                                                                                 |                                                                                     |
| <b>Time frame: past 36 months</b>                         |                                                                                                                                                                                |                                                                                              |                                                                                     |
| 2                                                         | Grants or contracts from any entity (if not indicated in item #1 above).                                                                                                       | <input checked="" type="checkbox"/> None                                                     |                                                                                     |
|                                                           |                                                                                                                                                                                |                                                                                              |                                                                                     |
| 3                                                         | Royalties or licenses                                                                                                                                                          | <input checked="" type="checkbox"/> None                                                     |                                                                                     |
|                                                           |                                                                                                                                                                                |                                                                                              |                                                                                     |

|    |                                                                                                              |               |  |
|----|--------------------------------------------------------------------------------------------------------------|---------------|--|
| 4  | Consulting fees                                                                                              | <u>√</u> None |  |
| 5  | Payment or honoraria for lectures, presentations, speakers bureaus, manuscript writing or educational events | <u>√</u> None |  |
| 6  | Payment for expert testimony                                                                                 | <u>√</u> None |  |
| 7  | Support for attending meetings and/or travel                                                                 | <u>√</u> None |  |
| 8  | Patents planned, issued or pending                                                                           | <u>√</u> None |  |
| 9  | Participation on a Data Safety Monitoring Board or Advisory Board                                            | <u>√</u> None |  |
| 10 | Leadership or fiduciary role in other board, society, committee or advocacy group, paid or unpaid            | <u>√</u> None |  |
| 11 | Stock or stock options                                                                                       | <u>√</u> None |  |
| 12 | Receipt of equipment, materials, drugs, medical writing, gifts or other services                             | <u>√</u> None |  |
| 13 | Other financial or non-financial interests                                                                   | <u>√</u> None |  |

**Please summarize the above conflict of interest in the following box:**

The project was supported by the Natural Science Foundation of Fujian Province, China (grant No. 2020J011341) and the Health Youth Scientific Research Project of Fujian Province, China (grant No. 2021QNA075). The authors have no other conflicts of interest to declare.

**Please place an "X" next to the following statement to indicate your agreement:**

X I certify that I have answered every question and have not altered the wording of any of the questions on this form.



## ICMJE DISCLOSURE FORM

Date: 2022-04-08

Your Name: Xuekun Nie

Manuscript Title: Cost-effectiveness of empagliflozin as a treatment for heart failure with reduced ejection fraction: an analysis from the Chinese healthcare perspective

Manuscript number (if known): \_\_\_\_\_

In the interest of transparency, we ask you to disclose all relationships/activities/interests listed below that are related to the content of your manuscript. "Related" means any relation with for-profit or not-for-profit third parties whose interests may be affected by the content of the manuscript. Disclosure represents a commitment to transparency and does not necessarily indicate a bias. If you are in doubt about whether to list a relationship/activity/interest, it is preferable that you do so.

The following questions apply to the author's relationships/activities/interests as they relate to the current manuscript only.

The author's relationships/activities/interests should be defined broadly. For example, if your manuscript pertains to the epidemiology of hypertension, you should declare all relationships with manufacturers of antihypertensive medication, even if that medication is not mentioned in the manuscript.

In item #1 below, report all support for the work reported in this manuscript without time limit. For all other items, the time frame for disclosure is the past 36 months.

|                                                           |                                                                                                                                                                                | Name all entities with whom you have this relationship or indicate none (add rows as needed) | Specifications/Comments (e.g., if payments were made to you or to your institution) |
|-----------------------------------------------------------|--------------------------------------------------------------------------------------------------------------------------------------------------------------------------------|----------------------------------------------------------------------------------------------|-------------------------------------------------------------------------------------|
| <b>Time frame: Since the initial planning of the work</b> |                                                                                                                                                                                |                                                                                              |                                                                                     |
| 1                                                         | All support for the present manuscript (e.g., funding, provision of study materials, medical writing, article processing charges, etc.)<br><b>No time limit for this item.</b> | The project was supported                                                                    |                                                                                     |
|                                                           |                                                                                                                                                                                | by the Natural Science                                                                       |                                                                                     |
|                                                           |                                                                                                                                                                                | Foundation of Fujian                                                                         |                                                                                     |
|                                                           |                                                                                                                                                                                | Province, China (grant No.                                                                   |                                                                                     |
|                                                           |                                                                                                                                                                                | 2020J011341) and the                                                                         |                                                                                     |
|                                                           |                                                                                                                                                                                | Health Youth Scientific                                                                      |                                                                                     |
|                                                           | Research Project of Fujian                                                                                                                                                     |                                                                                              |                                                                                     |
|                                                           | Province, China (grant No.                                                                                                                                                     |                                                                                              |                                                                                     |
|                                                           | 2021QNA075).                                                                                                                                                                   |                                                                                              |                                                                                     |
| <b>Time frame: past 36 months</b>                         |                                                                                                                                                                                |                                                                                              |                                                                                     |
| 2                                                         | Grants or contracts from any entity (if not indicated in item #1 above).                                                                                                       | <input checked="" type="checkbox"/> None                                                     |                                                                                     |
|                                                           |                                                                                                                                                                                |                                                                                              |                                                                                     |
| 3                                                         | Royalties or licenses                                                                                                                                                          | <input checked="" type="checkbox"/> None                                                     |                                                                                     |
|                                                           |                                                                                                                                                                                |                                                                                              |                                                                                     |

|    |                                                                                                              |               |  |
|----|--------------------------------------------------------------------------------------------------------------|---------------|--|
| 4  | Consulting fees                                                                                              | <u>√</u> None |  |
| 5  | Payment or honoraria for lectures, presentations, speakers bureaus, manuscript writing or educational events | <u>√</u> None |  |
| 6  | Payment for expert testimony                                                                                 | <u>√</u> None |  |
| 7  | Support for attending meetings and/or travel                                                                 | <u>√</u> None |  |
| 8  | Patents planned, issued or pending                                                                           | <u>√</u> None |  |
| 9  | Participation on a Data Safety Monitoring Board or Advisory Board                                            | <u>√</u> None |  |
| 10 | Leadership or fiduciary role in other board, society, committee or advocacy group, paid or unpaid            | <u>√</u> None |  |
| 11 | Stock or stock options                                                                                       | <u>√</u> None |  |
| 12 | Receipt of equipment, materials, drugs, medical writing, gifts or other services                             | <u>√</u> None |  |
| 13 | Other financial or non-financial interests                                                                   | <u>√</u> None |  |

Please summarize the above conflict of interest in the following box:

The project was supported by the Natural Science Foundation of Fujian Province, China (grant No. 2020J011341) and the Health Youth Scientific Research Project of Fujian Province, China (grant No. 2021QNA075). The authors have no other conflicts of interest to declare.

Please place an "X" next to the following statement to indicate your agreement:

X I certify that I have answered every question and have not altered the wording of any of the questions on this form.

## ICMJE DISCLOSURE FORM

Date: 2022-04-08

Your Name: Zichun Chen

Manuscript Title: Cost-effectiveness of empagliflozin as a treatment for heart failure with reduced ejection fraction: an analysis from the Chinese healthcare perspective

Manuscript number (if known): \_\_\_\_\_

In the interest of transparency, we ask you to disclose all relationships/activities/interests listed below that are related to the content of your manuscript. "Related" means any relation with for-profit or not-for-profit third parties whose interests may be affected by the content of the manuscript. Disclosure represents a commitment to transparency and does not necessarily indicate a bias. If you are in doubt about whether to list a relationship/activity/interest, it is preferable that you do so.

The following questions apply to the author's relationships/activities/interests as they relate to the current manuscript only.

The author's relationships/activities/interests should be defined broadly. For example, if your manuscript pertains to the epidemiology of hypertension, you should declare all relationships with manufacturers of antihypertensive medication, even if that medication is not mentioned in the manuscript.

In item #1 below, report all support for the work reported in this manuscript without time limit. For all other items, the time frame for disclosure is the past 36 months.

|                                                           |                                                                                                                                                                                | Name all entities with whom you have this relationship or indicate none (add rows as needed) | Specifications/Comments (e.g., if payments were made to you or to your institution) |
|-----------------------------------------------------------|--------------------------------------------------------------------------------------------------------------------------------------------------------------------------------|----------------------------------------------------------------------------------------------|-------------------------------------------------------------------------------------|
| <b>Time frame: Since the initial planning of the work</b> |                                                                                                                                                                                |                                                                                              |                                                                                     |
| 1                                                         | All support for the present manuscript (e.g., funding, provision of study materials, medical writing, article processing charges, etc.)<br><b>No time limit for this item.</b> | The project was supported                                                                    |                                                                                     |
|                                                           |                                                                                                                                                                                | by the Natural Science                                                                       |                                                                                     |
|                                                           |                                                                                                                                                                                | Foundation of Fujian                                                                         |                                                                                     |
|                                                           |                                                                                                                                                                                | Province, China (grant No.                                                                   |                                                                                     |
|                                                           |                                                                                                                                                                                | 2020J011341) and the                                                                         |                                                                                     |
|                                                           |                                                                                                                                                                                | Health Youth Scientific                                                                      |                                                                                     |
|                                                           | Research Project of Fujian                                                                                                                                                     |                                                                                              |                                                                                     |
|                                                           | Province, China (grant No.                                                                                                                                                     |                                                                                              |                                                                                     |
|                                                           | 2021QNA075).                                                                                                                                                                   |                                                                                              |                                                                                     |
| <b>Time frame: past 36 months</b>                         |                                                                                                                                                                                |                                                                                              |                                                                                     |
| 2                                                         | Grants or contracts from any entity (if not indicated in item #1 above).                                                                                                       | <input checked="" type="checkbox"/> None                                                     |                                                                                     |
|                                                           |                                                                                                                                                                                |                                                                                              |                                                                                     |
| 3                                                         | Royalties or licenses                                                                                                                                                          | <input checked="" type="checkbox"/> None                                                     |                                                                                     |
|                                                           |                                                                                                                                                                                |                                                                                              |                                                                                     |

|    |                                                                                                              |               |  |
|----|--------------------------------------------------------------------------------------------------------------|---------------|--|
| 4  | Consulting fees                                                                                              | <u>√</u> None |  |
| 5  | Payment or honoraria for lectures, presentations, speakers bureaus, manuscript writing or educational events | <u>√</u> None |  |
| 6  | Payment for expert testimony                                                                                 | <u>√</u> None |  |
| 7  | Support for attending meetings and/or travel                                                                 | <u>√</u> None |  |
| 8  | Patents planned, issued or pending                                                                           | <u>√</u> None |  |
| 9  | Participation on a Data Safety Monitoring Board or Advisory Board                                            | <u>√</u> None |  |
| 10 | Leadership or fiduciary role in other board, society, committee or advocacy group, paid or unpaid            | <u>√</u> None |  |
| 11 | Stock or stock options                                                                                       | <u>√</u> None |  |
| 12 | Receipt of equipment, materials, drugs, medical writing, gifts or other services                             | <u>√</u> None |  |
| 13 | Other financial or non-financial interests                                                                   | <u>√</u> None |  |

**Please summarize the above conflict of interest in the following box:**

The project was supported by the Natural Science Foundation of Fujian Province, China (grant No. 2020J011341) and the Health Youth Scientific Research Project of Fujian Province, China (grant No. 2021QNA075). The authors have no other conflicts of interest to declare.

**Please place an "X" next to the following statement to indicate your agreement:**

X I certify that I have answered every question and have not altered the wording of any of the questions on this form.

## ICMJE DISCLOSURE FORM

Date: 2022-04-08

Your Name: Bin Zheng

Manuscript Title: Cost-effectiveness of empagliflozin as a treatment for heart failure with reduced ejection fraction: an analysis from the Chinese healthcare perspective

Manuscript number (if known): \_\_\_\_\_

In the interest of transparency, we ask you to disclose all relationships/activities/interests listed below that are related to the content of your manuscript. "Related" means any relation with for-profit or not-for-profit third parties whose interests may be affected by the content of the manuscript. Disclosure represents a commitment to transparency and does not necessarily indicate a bias. If you are in doubt about whether to list a relationship/activity/interest, it is preferable that you do so.

The following questions apply to the author's relationships/activities/interests as they relate to the current manuscript only.

The author's relationships/activities/interests should be defined broadly. For example, if your manuscript pertains to the epidemiology of hypertension, you should declare all relationships with manufacturers of antihypertensive medication, even if that medication is not mentioned in the manuscript.

In item #1 below, report all support for the work reported in this manuscript without time limit. For all other items, the time frame for disclosure is the past 36 months.

|                                                           |                                                                                                                                                                                | Name all entities with whom you have this relationship or indicate none (add rows as needed)                                                                                                                     | Specifications/Comments (e.g., if payments were made to you or to your institution) |
|-----------------------------------------------------------|--------------------------------------------------------------------------------------------------------------------------------------------------------------------------------|------------------------------------------------------------------------------------------------------------------------------------------------------------------------------------------------------------------|-------------------------------------------------------------------------------------|
| <b>Time frame: Since the initial planning of the work</b> |                                                                                                                                                                                |                                                                                                                                                                                                                  |                                                                                     |
| 1                                                         | All support for the present manuscript (e.g., funding, provision of study materials, medical writing, article processing charges, etc.)<br><b>No time limit for this item.</b> | The project was supported by the Natural Science Foundation of Fujian Province, China (grant No. 2020J011341) and the Health Youth Scientific Research Project of Fujian Province, China (grant No. 2021QNA075). |                                                                                     |
|                                                           |                                                                                                                                                                                |                                                                                                                                                                                                                  |                                                                                     |
|                                                           |                                                                                                                                                                                |                                                                                                                                                                                                                  |                                                                                     |
|                                                           |                                                                                                                                                                                |                                                                                                                                                                                                                  |                                                                                     |
|                                                           |                                                                                                                                                                                |                                                                                                                                                                                                                  |                                                                                     |
|                                                           |                                                                                                                                                                                |                                                                                                                                                                                                                  |                                                                                     |
| <b>Time frame: past 36 months</b>                         |                                                                                                                                                                                |                                                                                                                                                                                                                  |                                                                                     |
| 2                                                         | Grants or contracts from any entity (if not indicated in item #1 above).                                                                                                       | <input checked="" type="checkbox"/> None                                                                                                                                                                         |                                                                                     |
|                                                           |                                                                                                                                                                                |                                                                                                                                                                                                                  |                                                                                     |
| 3                                                         | Royalties or licenses                                                                                                                                                          | <input checked="" type="checkbox"/> None                                                                                                                                                                         |                                                                                     |
|                                                           |                                                                                                                                                                                |                                                                                                                                                                                                                  |                                                                                     |
|                                                           |                                                                                                                                                                                |                                                                                                                                                                                                                  |                                                                                     |

|    |                                                                                                              |               |  |
|----|--------------------------------------------------------------------------------------------------------------|---------------|--|
| 4  | Consulting fees                                                                                              | <u>√</u> None |  |
| 5  | Payment or honoraria for lectures, presentations, speakers bureaus, manuscript writing or educational events | <u>√</u> None |  |
| 6  | Payment for expert testimony                                                                                 | <u>√</u> None |  |
| 7  | Support for attending meetings and/or travel                                                                 | <u>√</u> None |  |
| 8  | Patents planned, issued or pending                                                                           | <u>√</u> None |  |
| 9  | Participation on a Data Safety Monitoring Board or Advisory Board                                            | <u>√</u> None |  |
| 10 | Leadership or fiduciary role in other board, society, committee or advocacy group, paid or unpaid            | <u>√</u> None |  |
| 11 | Stock or stock options                                                                                       | <u>√</u> None |  |
| 12 | Receipt of equipment, materials, drugs, medical writing, gifts or other services                             | <u>√</u> None |  |
| 13 | Other financial or non-financial interests                                                                   | <u>√</u> None |  |

**Please summarize the above conflict of interest in the following box:**

The project was supported by the Natural Science Foundation of Fujian Province, China (grant No. 2020J011341) and the Health Youth Scientific Research Project of Fujian Province, China (grant No. 2021QNA075). The authors have no other conflicts of interest to declare.

**Please place an "X" next to the following statement to indicate your agreement:**

X I certify that I have answered every question and have not altered the wording of any of the questions on this form.
